# Supplementary material
Source: Springer Nature journal article supplement (https://www.springermedizin.de/resource/supplementary/12885_2011_2769_MOESM1_ESM.pdf/9461902)

**Radiation  
(XRT)**

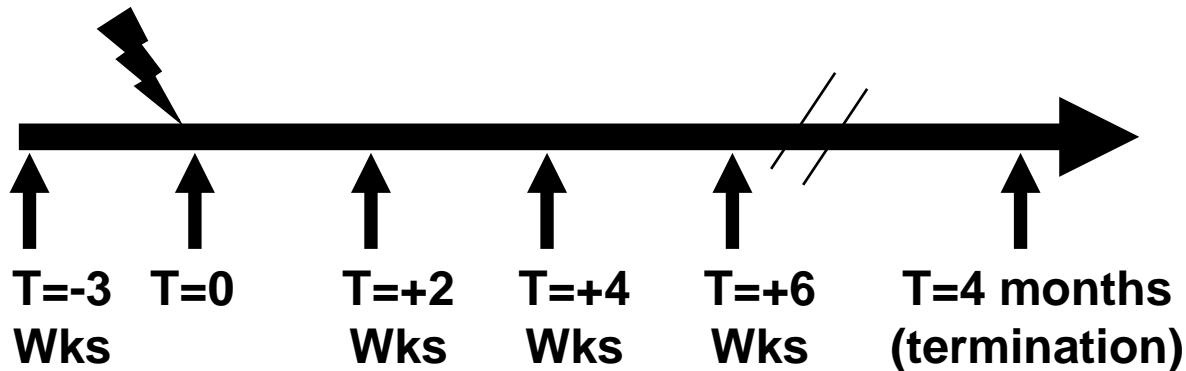

**Time of FS Diet Initiation**

Supplement: MOESM1 [file 9461902]
